# Supplementary material
Source: Springer Nature journal article supplement (https://www.springermedizin.de/resource/supplementary/12968_2009_945_MOESM1_ESM.pdf/9580012)
Supplement: MOESM1 [file 9580012]

## DMD

**Age < 12 yrs**

**Group A** (n=12)  
Age =  $10.5 \pm 2.6$  yrs  
EF =  $64 \pm 4\%$

**Age  $\geq 12$  yrs**

**EF > 55%**

**Group B** (n=8)  
Age =  $17.5 \pm 4.6$  yrs  
EF =  $61 \pm 3\%$

## CONTROL

**Group N1** (n=6)  
Age =  $7.3 \pm 1.5$  yrs  
EF =  $65 \pm 5\%$

**Group N2** (n=5)  
Age =  $41.2 \pm 4.8$  yrs

**EF  $\leq 55\%$**

**Group C** (n=6)  
Age =  $17.5 \pm 6.2$  yrs  
EF =  $40 \pm 11\%$
